# Supplementary material
Source: PubMed Central journal article supplement (PMC2886017)
Supplement: NIHMS207405-supplement-1_si_001.pdf [file NIHMS207405-supplement-1_si_001.pdf]

# Solid-State NMR Reveals the Hydrophobic-Core Location of Poly(amidoamine) Dendrimers in Biomembranes

*Pieter E. S. Smith<sup>1</sup>, Jeffrey R. Brender<sup>1,2</sup>, Ulrich H. N. Dürr<sup>1,2</sup>, Jiadi Xu<sup>1,2</sup>, Douglas G. Mullen<sup>3</sup>, Mark M. Banaszak Holl<sup>1,2,3</sup>, and Ayyalusamy Ramamoorthy<sup>1,2\*</sup>*

<sup>1</sup>Biophysics, <sup>2</sup>Department of Chemistry, and <sup>3</sup>Macromolecular Science and Engineering Program,  
University of Michigan, Ann Arbor, MI, USA

AUTHOR EMAIL ADDRESS ramamoor@umich.edu

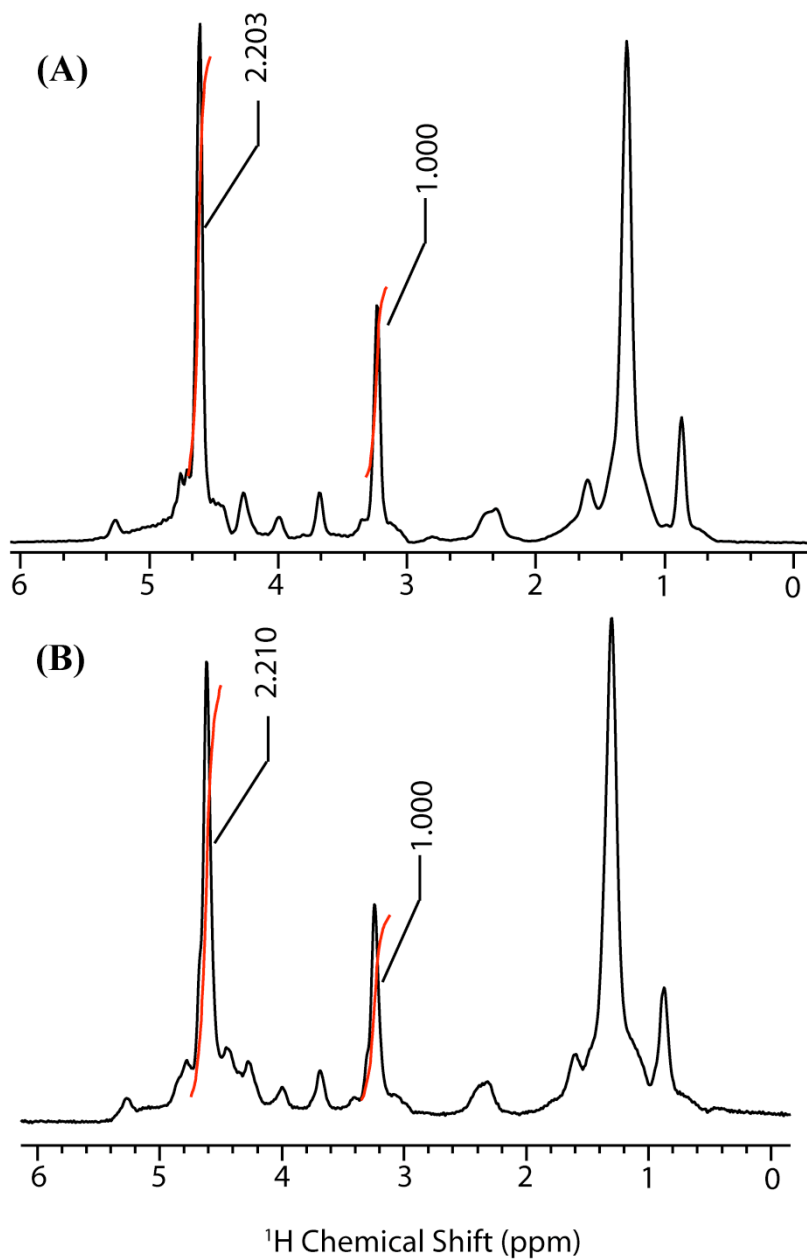

**Figure S1.** The  $^1\text{H}$  spectra of (A) the G5 dendrimer and lipid sample and the (B) G7 dendrimer and lipid sample. The area of the water peak (at  $\sim 4.7$  ppm) is in both cases about 2.2 times the area of the gamma  $^1\text{H}$  lipid peak (at  $\sim 3.15$  ppm). There are 9 gamma  $^1\text{H}$  nuclei per lipid molecule and 2  $^1\text{H}$  nuclei per water molecule, which means that there are  $\sim 10$  water molecules per lipid.
